# Supplementary material for: HER2DX Genomic Assay in HER2-Positive Early Breast Cancer Treated with Trastuzumab and Pertuzumab: A Correlative Analysis from the PHERGain Phase II Trial
Source: PubMed Central journal article supplement — Clin Cancer Res. 2024 Jul 12;30(18):4123–30. doi: 10.1158/1078-0432.CCR-24-0464 (PMC11393543; doi:10.1158/1078-0432.ccr-24-0464), 2024-07-12
Supplement: ccr-24-0464_supplementary_data1_suppds1.pdf [file ccr-24-0464_supplementary_data1_suppds1.pdf]

## **Supplementary Material**

### **HER2DX Genomic Assay in HER2-positive Early Breast Cancer Treated with Trastuzumab and Pertuzumab: A Correlative Analysis from PHERGain Phase II Trial**

Antonio Llombart-Cussac, Jose Pérez-García, Fara Brasó-Maristany, Laia Paré, Guillermo Villacampa, Maria Gion, Peter Schmid, Marco Colleoni, Manuel Ruiz Borrego, Patricia Galván, Joel S. Parker, Wesley Buckingham, Charles M. Perou, Patricia Villagrana, Jose Antonio Guerrero, Miguel Sampayo-Cordero, Mario Mancino, Aleix Prat and Javier Cortés

**Supplementary Table 1. MVA models for pCR prediction.** Model 1 includes clinicopathological data. Model 2 includes clinicopathological data and HER2DX pCR score as a categorical variable. Model 3 includes clinicopathological data and HER2DX pCR score as a continuous variable.

| <b>Model 1</b>                          | <b>Odds ratio</b> | <b>95% CI (Low)</b> | <b>95% CI (High)</b> | <b>p-value</b> |
|-----------------------------------------|-------------------|---------------------|----------------------|----------------|
| Hormone receptor positive               | 0.60              | 0.34                | 1.06                 | 0.078          |
| <b>HER2 3+</b>                          | <b>2.69</b>       | <b>1.35</b>         | <b>5.66</b>          | <b>0.006</b>   |
| T2                                      | 0.79              | 0.38                | 1.66                 | 0.531          |
| T3                                      | 0.55              | 0.21                | 1.40                 | 0.213          |
| N1                                      | 0.71              | 0.41                | 1.23                 | 0.225          |
| N2                                      | 0.83              | 0.26                | 2.48                 | 0.733          |
| Ki67                                    | 1.00              | 0.99                | 1.02                 | 0.642          |
| G1 or G2                                | 1.60              | 0.72                | 3.68                 | 0.253          |
| G3                                      | 1.30              | 0.60                | 2.92                 | 0.514          |
| <b>Cohort B</b>                         | <b>0.37</b>       | <b>0.19</b>         | <b>0.69</b>          | <b>0.002</b>   |
| <b>Model 2</b>                          | <b>Odds ratio</b> | <b>95% CI (Low)</b> | <b>95% CI (High)</b> | <b>p-value</b> |
| <b>HER2DX pCR Low</b>                   | <b>0.37</b>       | <b>0.14</b>         | <b>0.92</b>          | <b>0.034</b>   |
| HER2DX pCR Med                          | 0.67              | 0.32                | 1.37                 | 0.274          |
| Hormone receptor positive               | 0.91              | 0.45                | 1.83                 | 0.790          |
| HER2 3+                                 | 2.05              | 0.98                | 4.49                 | 0.062          |
| T2                                      | 1.00              | 0.47                | 2.16                 | 0.997          |
| T3                                      | 0.72              | 0.27                | 1.90                 | 0.504          |
| N1                                      | 0.72              | 0.41                | 1.24                 | 0.235          |
| N2                                      | 0.86              | 0.28                | 2.59                 | 0.789          |
| Ki67                                    | 1.00              | 0.99                | 1.01                 | 0.883          |
| G1 or G2                                | 1.74              | 0.77                | 4.10                 | 0.190          |
| G3                                      | 1.22              | 0.55                | 2.79                 | 0.627          |
| <b>Cohort B</b>                         | <b>0.35</b>       | <b>0.18</b>         | <b>0.66</b>          | <b>0.001</b>   |
| <b>Model 3</b>                          | <b>Odds ratio</b> | <b>95% CI (Low)</b> | <b>95% CI (High)</b> | <b>p-value</b> |
| <b>HER2DX pCR score (cont.variable)</b> | <b>1.69</b>       | <b>1.07</b>         | <b>2.75</b>          | <b>0.028</b>   |
| Hormone receptor positive               | 0.95              | 0.48                | 1.90                 | 0.884          |
| HER2 3+                                 | 2.03              | 0.97                | 4.44                 | 0.065          |
| T2                                      | 1.04              | 0.48                | 2.28                 | 0.923          |
| T3                                      | 0.73              | 0.27                | 1.93                 | 0.525          |
| N1                                      | 0.75              | 0.43                | 1.30                 | 0.311          |
| N2                                      | 0.88              | 0.28                | 2.65                 | 0.824          |
| Ki67                                    | 1.00              | 0.99                | 1.01                 | 0.977          |
| G1 or G2                                | 1.59              | 0.71                | 3.67                 | 0.266          |
| G3                                      | 1.12              | 0.51                | 2.56                 | 0.777          |
| <b>Cohort B</b>                         | <b>0.35</b>       | <b>0.18</b>         | <b>0.67</b>          | <b>0.002</b>   |

**Supplementary Table 2. Bootstrap test comparing the C-statistics of model 2 vs model 1:  
p-value of 0.13**

|                     | <b>Model 1</b>     | <b>Model 2</b>     | <b>Model 3</b>     |
|---------------------|--------------------|--------------------|--------------------|
| <b>AIC</b>          | 376.8              | 375.8              | 373.5              |
| <b>R-squared</b>    | 0.14               | 0.17               | 0.17               |
| <b>C-statistics</b> | 0.69 (0.63 – 0.76) | 0.71 (0.65 – 0.77) | 0.70 (0.64 – 0.77) |

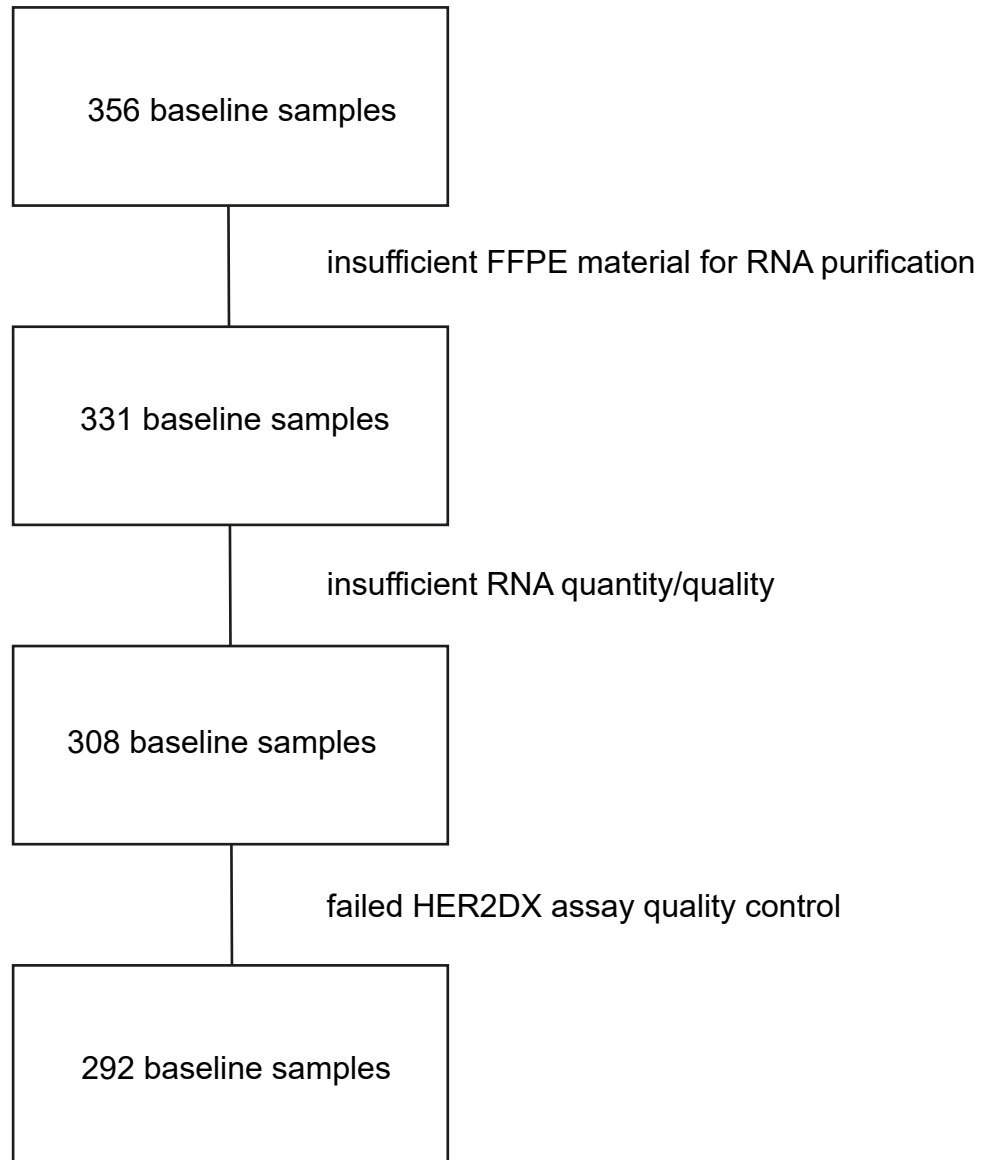

**Supplementary Figure 1. Consort diagram of samples available for HER2DX**

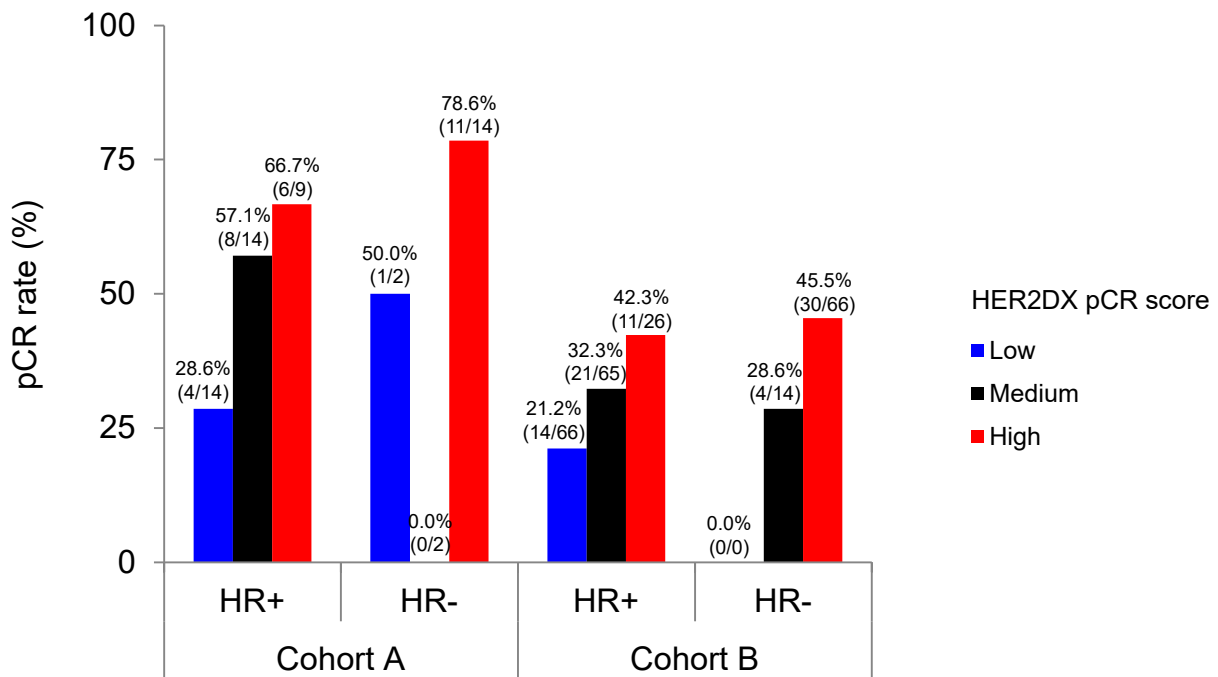

**Supplementary Figure 2. pCR rates according to HER2DX pCR score groups in patients with hormone receptor-positive (HR+) and -negative (HR-) tumors in cohorts A and B.**
